# Supplementary material for: Operating Room Performance Optimization Metrics: a Systematic Review
Source: PubMed Central journal article supplement (PMC9899172; doi:10.1007/s10916-023-01912-9), 2023-02-04

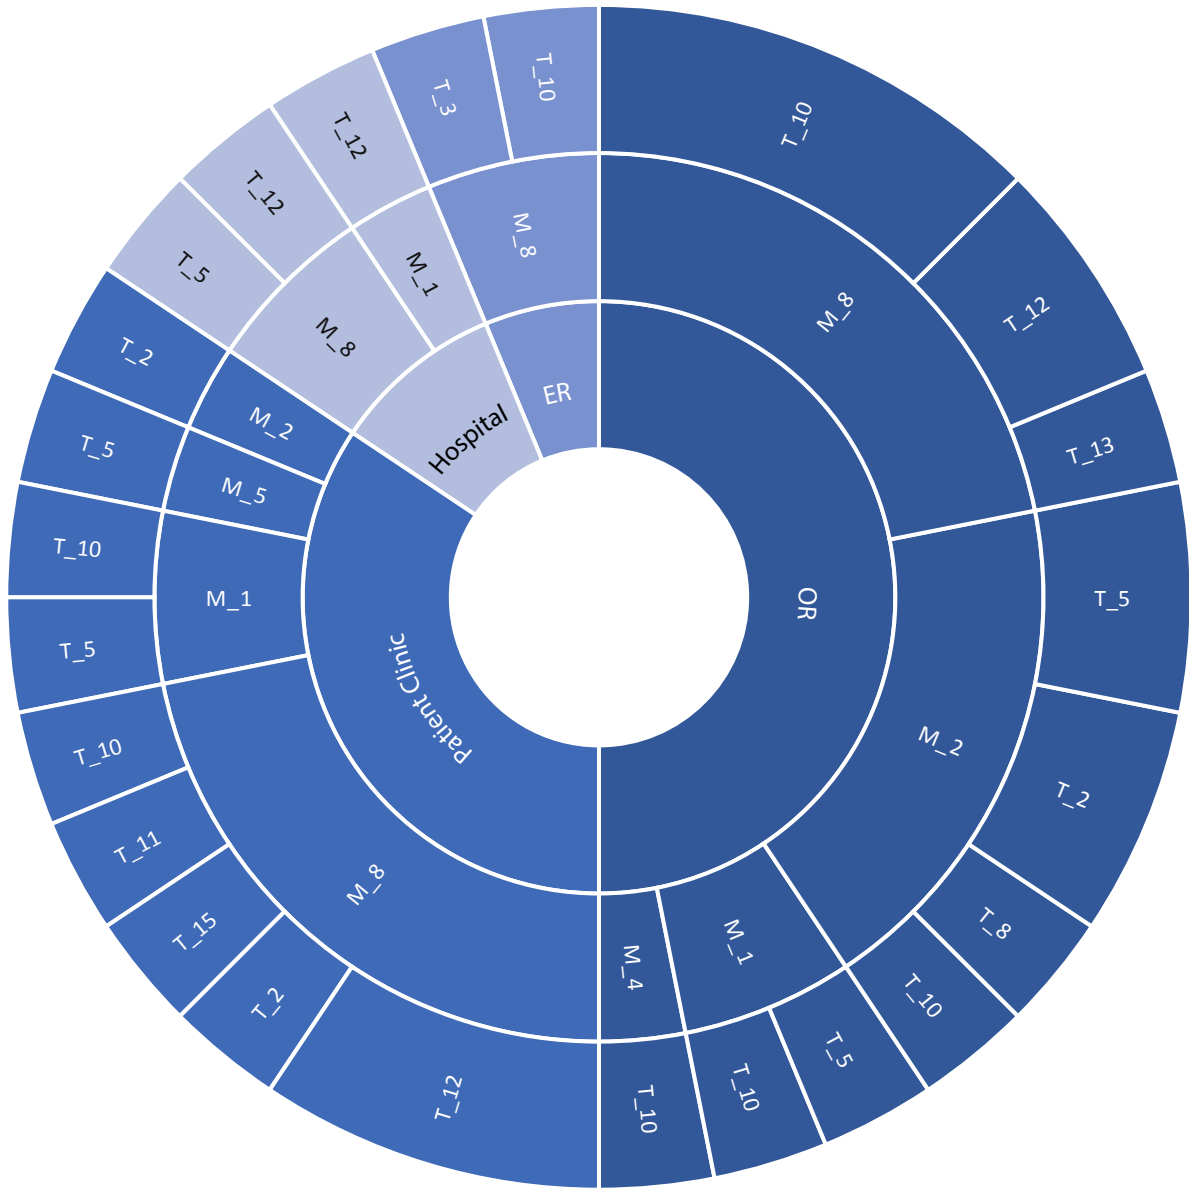

Supplement: 10916_2023_1912_MOESM1_ESM.pdf [file 10916_2023_1912_MOESM1_ESM.pdf]
